# Supplementary material
Source: PubMed Central journal article supplement (PMC5728051)
Supplement: ba003632-suppl1.pdf [file ba003632-suppl1.pdf]

**Supplementary Table 1. Clinicopathological characteristics of patients**

|               | Age | Gender | Dx   | RT                | Last f/u             | Rai | ZAP70 | Karyotype*  | FISH*                  |
|---------------|-----|--------|------|-------------------|----------------------|-----|-------|-------------|------------------------|
| <b>CLL011</b> | 44  | F      | 1999 | 8/2015            | 10/2015 <sup>#</sup> | 1   | +     | normal      | TP53 del               |
| <b>CLL012</b> | 54  | F      | 2007 | 2/2014            | 04/2015 <sup>#</sup> | 0   | +     | complex     | TP53 del               |
| <b>CLL015</b> | 49  | F      | 2000 |                   | 09/2012 <sup>#</sup> |     | +     | N/A         | TP53 del<br>Trisomy 12 |
| <b>CLL017</b> | 68  | M      | 2012 | 3/2015            | 06/2015 <sup>#</sup> | 4   | +     | complex     | TP53 del               |
| <b>CLL019</b> | 61  | F      | 1988 | 6/2015            | 10/2015 <sup>#</sup> | 3   | +     | single loss | TP53 del               |
| <b>CLL020</b> | 46  | M      | 2008 | 5/2015            | 06/2015 <sup>#</sup> | 4   | N/A   | complex     | TP53 del               |
| <b>CLL021</b> | 66  | M      | 2006 |                   | 03/2016              | 0   | N/A   | complex     | TP53 del<br>Trisomy 12 |
| <b>CLL022</b> | 73  | M      | 2008 | 6/2012<br>10/2015 | 02/2016 <sup>#</sup> | 1   | +     | normal      | TP53 del<br>Trisomy 12 |
| <b>CLL024</b> | 52  | F      | 2007 |                   | 03/2016              | 2   | +     | normal      | del(13q)               |

\*Latest pre-ibr time point. <sup>#</sup>patient deceased. N/A, data not available. Del, deletion.

**Supplemental Table 2. Sample collection detail**

| Patient | Time point     | Abbreviation used | Sample Type             | Days between consecutive time points |
|---------|----------------|-------------------|-------------------------|--------------------------------------|
| CLL011  | Pre lbr        | Pre-lbr           | BM                      |                                      |
|         | lbr initiation | lbr init          |                         | 8                                    |
|         | Responding1    | Resp1             | BM                      | 343                                  |
|         | Responding2    | Resp2             | BM                      | 180                                  |
|         | Relapse        | Rel               | BM                      | 80                                   |
|         | RT             | RT                | FFPE (lymph node)       | 134                                  |
| CLL012  | Pre lbr        | Pre-lbr           | BM                      |                                      |
|         | lbr initiation | lbr init          |                         | 2375                                 |
|         | Relapse        | Rel               | PB                      | 315                                  |
|         | RT             | RT                | FFPE (pleural effusion) | 20                                   |
| CLL017  | Pre lbr        | Pre-lbr           | BM                      |                                      |
|         | lbr initiation | lbr init          |                         | 609                                  |
|         | RT             | RT                | FFPE (lymph node)       | 59                                   |
|         | Relapse1       | Rel1**            | BM                      | 10                                   |
|         | Relapse2       | Rel2**            | PB                      | 81                                   |
| CLL019  | Pre lbr1       | Pre-lbr1          | FFPE (nasal)            |                                      |
|         | Pre lbr2       | Pre-lbr2          | BM                      | 722                                  |
|         | lbr initiation | lbr init          |                         | 14                                   |
|         | RT             | RT                | FFPE (liver)            | 763                                  |
|         | Relapse1       | Rel1              | PB                      | 8                                    |
|         | Relapse2       | Rel2              | PB                      | 84                                   |
| CLL020  | Pre lbr        | Pre-lbr           | BM                      |                                      |
|         | lbr initiation | lbr init          |                         | 21                                   |
|         | RT*            | RT                | FFPE (lymph node)       | 91                                   |
|         | Relapse        | Rel               | PB                      | 20                                   |
| CLL022  | Pre lbr        | Pre-lbr           | BM                      |                                      |
|         | lbr initiation | lbr init          |                         | 136                                  |
|         | RT*            | RT                | FFPE (lymph node)       | 593                                  |
|         | Relapse        | Rel               | PB                      | 15                                   |
| CLL015  | Pre lbr        | Pre-lbr           | PB                      |                                      |
|         | lbr initiation | lbr init          |                         | 55                                   |
|         | Responding     | Resp              | PB                      | 109                                  |
|         | Relapse1       | Rel1              | PB                      | 487                                  |
|         | Relapse2       | Rel2              | PB                      | 27                                   |
| CLL021  | Pre lbr        | Pre-lbr           | BM                      |                                      |
|         | lbr initiation | lbr init          |                         | 17                                   |
|         | Relapse        | Rel               | PB                      | 861                                  |
| CLL024  | Pre lbr        | Pre-lbr           | BM                      |                                      |
|         | lbr initiation | lbr init          |                         | 8                                    |
|         | Relapse        | Rel               | BM                      | 820                                  |

\*This lymph node has both RT and CLL components, which were macro-dissected and analyzed separately

\*\*Rel1 and Rel2 are sample codes and do not represent two different clinical relapses for the patients.

**Supplementary Table 3. CNA and gene mutation detail in pre vs rel sample for each patient.**

|        | Pre sample |               | Rel sample |               | Pre-specific |               | Rel-specific |               |
|--------|------------|---------------|------------|---------------|--------------|---------------|--------------|---------------|
|        | CNA        | Gene mutation | CNA        | Gene mutation | CNA          | Gene mutation | CNA          | Gene mutation |
| CLL011 | 10         | 28            | 12         | 27            | 0            | 4             | 2            | 3             |
| CLL012 | 7          | 21            | 22         | 24            | 0            | 2             | 15           | 5             |
| CLL017 | 3          | 32            | 3          | 33            | 0            | 0             | 0            | 1             |
| CLL019 | 5          | 24            | 5          | 24            | 0            | 0             | 0            | 0             |
| CLL020 | 5          | 19            | 7          | 20            | 0            | 0             | 2            | 1             |
| CLL022 | 2          | 21            | 4          | 25            | 1            | 2             | 3            | 6             |
| CLL015 | 11         | 26            | 10         | 26            | 1            | 2             | 0            | 2             |
| CLL021 | 7          | 27            | 7          | 27            | 0            | 0             | 0            | 0             |
| CLL024 | 4          | 15            | 3          | 17            | 1            | 0             | 0            | 2             |

\*This table supplements Figure 3 and the pre and rel samples compared are denoted in Fig 3A.

**Supplementary Table 4. Confirmation of minor BTK mutant clones by high-depth sequencing**

| Patient | Sample*           | Variant | Position  | Ref | Alt | OncoPlus             |        | CLL panel            |        | Repeat CLL panel     |        |
|---------|-------------------|---------|-----------|-----|-----|----------------------|--------|----------------------|--------|----------------------|--------|
|         |                   |         |           |     |     | Depth <sub>Q30</sub> | MAF(%) | Depth <sub>Q30</sub> | MAF(%) | Depth <sub>Q30</sub> | MAF(%) |
| CLL012  | Rel               | C481S   | 100611164 | C   | G   | 228                  | 2.6    | 497                  | 3.6    | 7052                 | 3.8    |
|         |                   | C481R   | 100611165 | A   | G   | 225                  | 1.3    | 494                  | 1.4    | 7049                 | 1.6    |
| CLL019  | Rel1              | C481S   | 100611164 | C   | G   | 865                  | 5.2    | 9517                 | 6.7    |                      |        |
| CLL015  | Rel1              | C481R   | 100611165 | A   | G   | 446                  | 3.8    |                      |        |                      |        |
|         |                   | C481S   | 100611164 | C   | G   | 445                  | 1.1    |                      |        |                      |        |
|         | Rel2              | C481R   | 100611165 | A   | G   | 525                  | 2.9    |                      |        |                      |        |
|         |                   | C481S   | 100611164 | C   | G   | 528                  | 1.9    |                      |        |                      |        |
|         | Rel3 <sup>#</sup> | C481R   | 100611165 | A   | G   |                      |        | 14323                | 2.2    | 1247                 | 3.8    |
|         |                   | C481S   | 100611164 | C   | G   |                      |        | 14334                | 0.5    | 1248                 | 0.7    |

\*See Suppl. Table 2 for sample detail

<sup>#</sup>In CLL015, the sample Rel3 was taken 2 months after sample Rel2 while the patient was still on ibr. It was used to confirm the existence of minor clones because samples Rel1 and Rel2 were exhausted.



Supplemental Figure 2

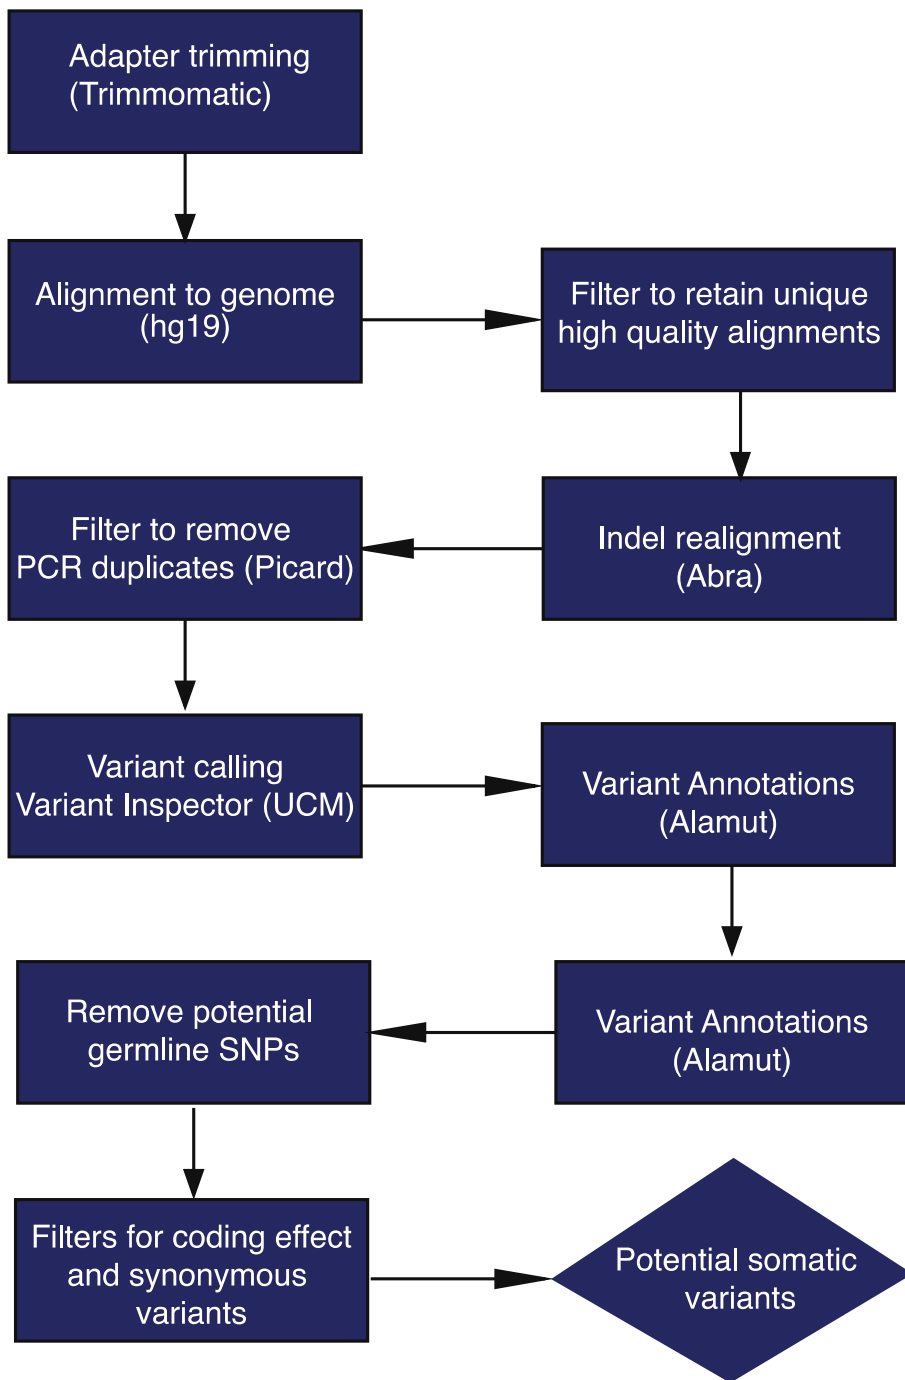

# Supplementary Figure 3

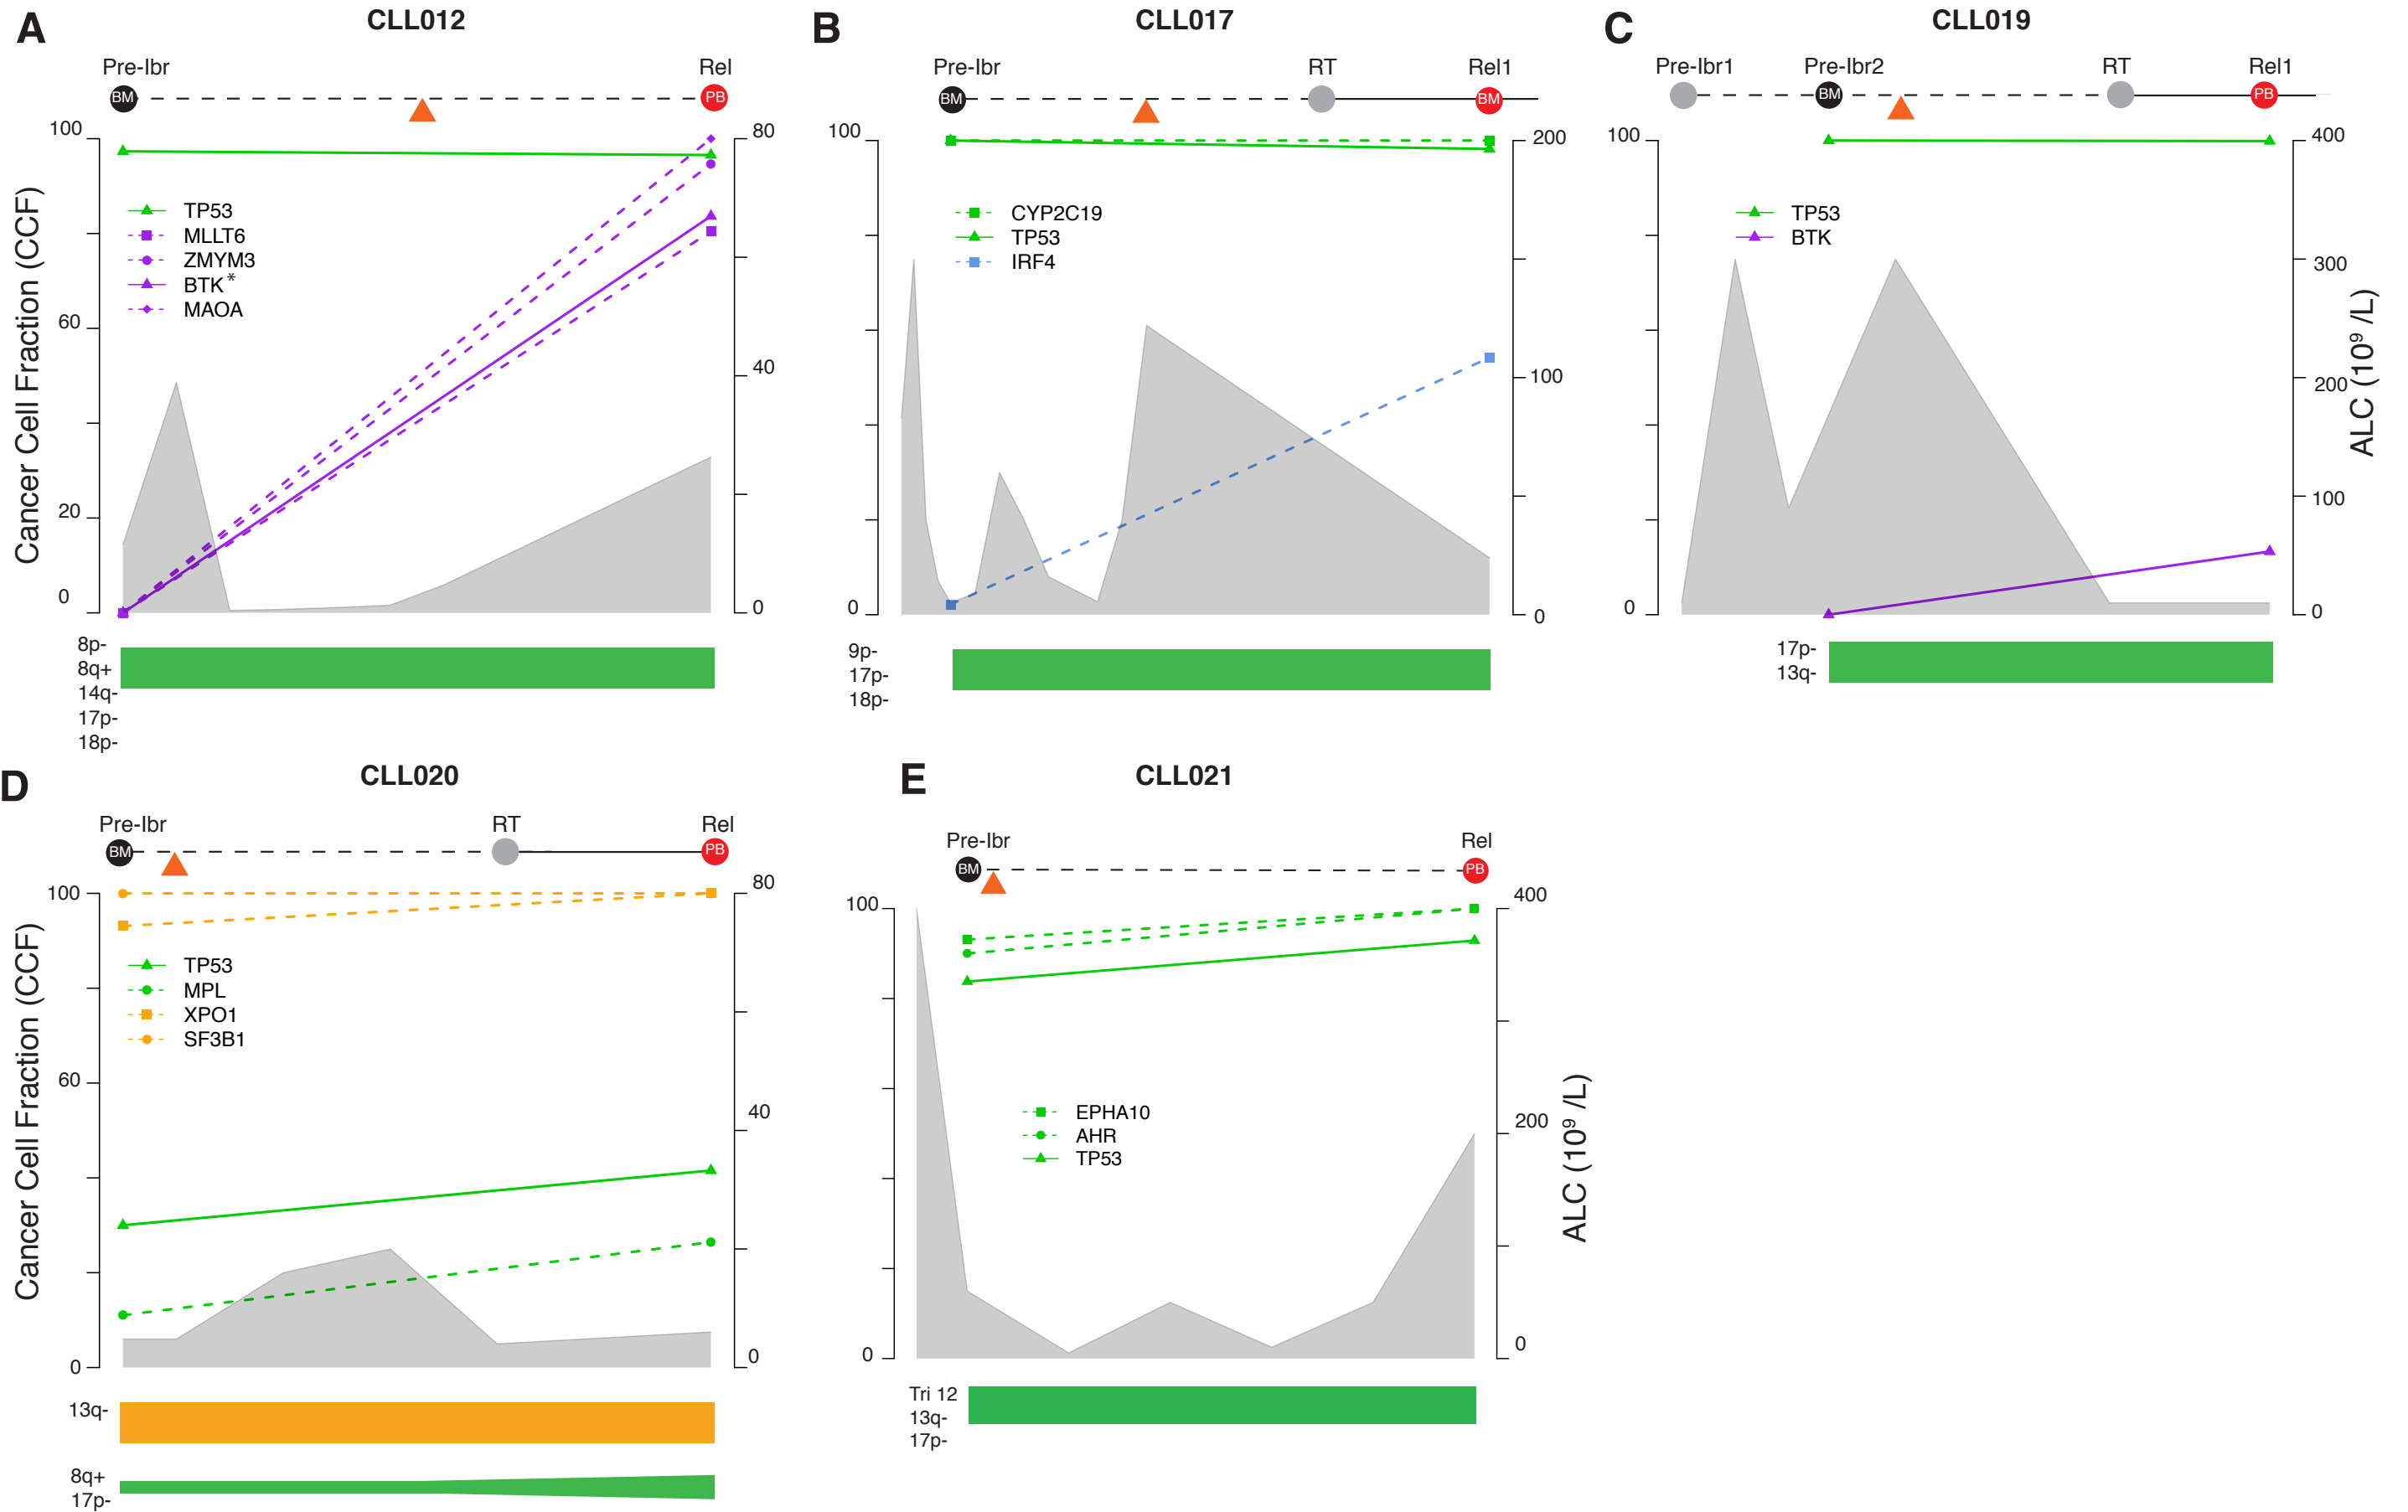

## **Suppl Figure legends**

**Suppl. Fig. 1. Schematic diagram of patient sample collection sorted by duration of response.** The line diagrams summarize sample collection for each of the 9 patients (6 with RT and 3 non-RT), with reference to ibr-initiation (orange triangle). In each group, the patients are sorted in increasing order of duration of response (DOR). The samples to the left of ibr initiation represent the Pre-ibr time points. The lines are not drawn to scale. Types of sample are noted (BM: Bone marrow, PB: Peripheral Blood, TS: Tissue).

**Suppl. Fig. 2. Custom-designed bioinformatics pipeline for detection of somatic variants from UCM-OncoPlus data.** The adapter-trimmed reads are aligned to the hg19 genome, filtered to remove low quality alignments and indel-realigned. PCR duplicates are then removed and variant calling is performed using a UCM variant caller, Variant Inspector. All resulting variants are annotated using Alamut, after which all potential germline SNPs and synonymous non-exonic variants are removed to generate a list of potential somatic variants.

**Suppl. Fig. 3. Evolutionary dynamics of the major clones during ibr relapse.** Clonal trends in additional patients patients). **A-E)** Detailed trends for CLL012, 017, 019, 020 and 021. Samples being analyzed are shown on the top of the plots. Time on the X-axis is partially scaled consistent with Fig. 1. Clonal frequencies are shown on the left Y-axis while ALC values are shown on the right Y-axis (grey shaded curves). Mutations that clustered in the same trends are shown in the same colors (Green: TP53



clusters, Purple: BTK clusters, and Yellow: SF3B1 clusters). The clonal trends of the copy number changes are shown below each plot using the same color scheme.
